# Supplementary material for: Comparative proteomics of clathrin-coated vesicles
Source: PubMed Central journal article supplement — J Cell Biol. 2006 Nov 20;175(4):571–8. doi: 10.1083/jcb.200607164 (PMC2064594; doi:10.1083/jcb.200607164), 2006-11-20
Supplement: jcellbiol_jcb.200607164_1.pdf [file jcellbiol_jcb.200607164_1.pdf]

Borner et al., <http://www.jcb.org/cgi/content/full/jcb.200607164/DC1>

## Supplemental materials and methods

### CCV preparations

CCV-enriched fractions were prepared essentially as described by Hirst et al. (2004). In brief, four to six confluent dishes (500 cm<sup>2</sup>) of HeLa cells were scraped into buffer A (0.1 M MES, pH 6.5, 0.2 mM EGTA, 0.5 mM MgCl<sub>2</sub>, and 0.02% NaN<sub>3</sub>) supplemented with 0.2 mM AEBSF. Cells were homogenized with a motorized Dounce homogenizer (20 strokes), and centrifuged at 4,147 *g* for 32 min. Supernatants were treated with ribonuclease A at 50 µg/ml for 60 min. Membranes were pelleted by centrifugation at 135,750 *g* for 30–45 min. Membranes were resuspended in buffer A and mixed with an equal volume of 12.5% Ficoll/12.5% sucrose in buffer A. Samples were spun at 21,720 *g* for 34 min to pellet most of the contaminating membranes. Supernatants were diluted with four volumes of buffer A, and CCV-enriched fractions were pelleted by centrifugation at 135,750 *g* for 30–45 min. All preparations were performed at 4°C. Mock CCV fractions were prepared likewise, but from 8 to 12 confluent dishes (15 cm) of HeLa cells that had been treated with siRNA against clathrin heavy chain.

### 1D and 2D gels

SDS-PAGE and Western blots were performed according to standard protocols. The antibodies used in this study are listed in Table S3. For analysis by 2D gel electrophoresis, CCV-enriched fractions were resuspended in 2.5% SDS/50 mM Tris, pH 8.0, heated to 65°C for 2 min, and spun at 16,000 *g* for 2 min. Proteins were precipitated from supernatants with 5 volumes of acetone at –20°C for a minimum of 16 h and resuspended in AUT sample buffer (10 mM Tris-HCl, pH 8.5, 7 M urea, 2 M thiourea, 2% ASB14, and 0.5% Triton X-100) at room temperature. Samples were labeled with CyDyes Cy3 and Cy5 as described by Borner et al. (2003). All labeling reactions were performed in reciprocal duplicate. Fluorescent 2D DIGE was performed as in Borner et al. (2003), based on the method first published by Unlu et al. (1997). Nonlinear IPG-strips (pH 3–10) were used for the first dimension and 10% polyacrylamide gels for the second dimension.

### Mass spectrometry

#### Proteins excised from 1D gels

Identification of proteins was achieved by the standard techniques of in-gel trypsin digestion and peptide mass fingerprinting and fragmentation. Gel bands were excised and digested with trypsin according to the method of Shevchenko et al. (1996). Samples of tryptic peptide mixtures were mixed with α-cyano-4-hydroxy-transcinnamic acid matrix and analyzed with a MicroMass ToF-Spec2E or an ABI 4700 proteomics analyzer with TOFTOF optics. For peptide mass fingerprints, mass calibration was performed with features internal to the spectrum, specifically the matrix-related ion peak at 1,060.048 D and the trypsin autolysis peaks at 2,163.057 and 2,273.160 D. For peptide fragment spectra, an “external” mass calibration was generated from the 2,163.057-D trypsin autolysis peak, using the y10, y14, and y16 fragment ions. Spectra were interpreted by the Mascot sequence database search engine configured with a mass tolerance of 40 ppm and the gel-derived variable modifications “propionamide cysteine” and “methionine sulfoxide” against the National Center for Biotechnology Information (NCBI) database. Probability-based MASCOT scores were used to evaluate identifications. Only matches with *P* < 0.05 for random occurrence were considered significant (further explanation of Mascot scores can be found at <http://www.matrixscience.com>).

#### Proteins excised from 2D gels

Proteins within the gel pieces were first reduced, carboxyamidomethylated, and digested to peptides using trypsin on a MassPrepStation (Waters). The resulting peptides were applied to a liquid-chromatography tandem mass spectrometer. The reverse-phase liquid chromatographic separation of peptides was achieved with a PepMap C18 reverse phase, 75 mm i.d., 15-cm column (LC Packings) on a capillary LC system (Waters) attached to a QToF2 (Waters) mass spectrometer or the same column attached to a Dionex Dual Gradient LC system attached to a QSTAR XL (Applied Biosystems). The MS/MS fragmentation data achieved was used to search the NCBI database using the MASCOT search engine. Probability-based MASCOT scores were used to evaluate identifications. Only matches with *P* < 0.05 for random occurrence were considered significant.

### iTRAQ analysis

#### Sample preparation, labeling, and fractionation

For analysis by iTRAQ (Ross et al., 2004), control and mock CCV preps were resuspended in 2.5% SDS/50 mM Tris, pH 8.0, heated to 65°C for 2 min and spun at 16,000 *g* for 2 min. Proteins were precipitated from supernatants with 5 volumes of acetone at –20°C for a minimum of 16 h. Precipitates were solubilized in ~100 µl labeling buffer (25 mM triethylammonium bicarbonate [TEAB], pH 8.5, 8 M Urea, 2% Triton X-100, and 0.1% SDS). Protein concentrations were determined using the BCA Protein Assay kit (Pierce Chemical Co.). Samples were adjusted to the same protein concentration with labeling buffer and split into two equal aliquots to ob-

tain two pairs of mock and control CCVs (technical replicates). Samples (~70 µg of protein) were reduced (4 mM Tris[2-carboxyethyl]phosphine, 20°C, 1 h) and cysteines blocked (8 mM methyl methanethiosulfonate, 20°C, 10 min). Samples were diluted with 50 mM TEAB, pH 8.5, such that the urea concentration was <1 M, digested with trypsin overnight at 37°C (5 µg; Promega), and lyophilized. Samples were resuspended in 100 µl 0.25 M TEAB, pH 8.5, 75% ethanol, added to one unit of the corresponding iTRAQ reagent and incubated for 1 h at 20°C. A four-plex iTRAQ labeling (Applied Biosystems) was performed as follows: mock CCVs technical repeat 1 labeled with iTRAQ reagent 114; mock CCVs technical repeat 2 with 115; control CCVs technical repeat 1 with 116; control CCVs technical repeat 2 with 117. Residual reagents were hydrolyzed with 100 µl water (20°C, 15 min). The labeled peptides were then pooled, lyophilized, and resuspended in 3 ml 20% vol/vol acetonitrile, 10 mM KH<sub>2</sub>PO<sub>4</sub>/H<sub>3</sub>PO<sub>4</sub>, pH 2.7. Peptides were fractionation by cation-exchange chromatography on a BioLC HPLC system (Dionex) using a PolySulfoethyl A column (PolyLC; 2.1 × 200 mm, 5 µm, 300 Å). Samples were loaded onto the column and washed for 60 min at 200 µl/min. Peptides were eluted using a 70-min linear gradient of 30–125 mM KCl (20% vol/vol acetonitrile and 10 mM KH<sub>2</sub>PO<sub>4</sub>/H<sub>3</sub>PO<sub>4</sub>, pH 2.7) at 200 µl/min. Fractions were collected at 2-min intervals, lyophilized, and resuspended in 140 µl 2% acetonitrile and 0.1% trifluoroacetic acid.

Samples were analyzed by LC-MS/MS. The reverse-phase liquid chromatographic separation of peptides was achieved with a PepMap C18 reverse phase, 75 mm i.d., 15-cm column (LC Packings) on a capillary LC system (Waters) attached to a Dionex Dual Gradient LC system attached to a QSTAR XL (Applied Biosystems). The obtained MS/MS fragmentation data were used to search the NCBI database using the MASCOT search engine. Probability-based MASCOT scores were used to evaluate identifications. Only matches with  $P < 0.05$  for random occurrence were considered significant (further explanation of MASCOT scores can be found at <http://www.matrixscience.com>).

#### **Generation of a nonredundant protein database**

An important feature of the iTRACKER software (Shadforth et al., 2005) used for the quantitation of iTRAQ-labeled peptides is that it only processes peptides that are unique in the protein database. This ensures that the peptides are assigned unambiguously to parent proteins and that the observed quantitation refers to only one protein. This rigorous approach absolutely requires a nonredundant protein database, as multiple entries for the same protein (partial sequences, splice variants, etc.) will lead to the exclusion of the corresponding peptides. However, all currently available public databases are partially redundant; trial analysis of our iTRAQ data with the UniProt and Ensembl databases was unsatisfactory, as many identified proteins were not quantified (unpublished data). We therefore created our own protein database specifically for the iTRAQ analysis.

Proteins that had been identified in the iTRAQ-labeled samples by LC-MS/MS and the MASCOT search engine were compiled into a nonredundant list. Only proteins that fulfilled the following requirements were included: (1) a MASCOT score >36 (i.e.,  $P < 0.05$  for random match) and (2) at least one unique peptide with a MASCOT score  $\geq 20$ . Protein sequences were downloaded from the NCBI protein database (<http://www.ncbi.nlm.nih.gov>). In cases of redundant entries for the same protein, a representative sequence was chosen. With these criteria, a list of 903 proteins in FastA format was assembled. This list was called CP database (CCV Protein database) and used for iTRAQ quantitation.

#### **MS data analysis and protein quantitation**

MS data files were processed using the wiff2DTA software, which converts QSTAR data files (.wiff) into text files that contain  $m/z$  and intensity information (peak lists) for each product ion spectra (Boehm et al., 2004). Each MS data file was processed twice in order to generate centroided peak lists, which contain a single  $m/z$  value for each ion corresponding to the center of the peak, and uncentroided peak lists, which contain  $m/z$  information for the entire peak. Mascot version 2.0.01 (Matrix Science), was used to search centroided peak lists against the CP database. The following modifications were used: fixed, iTRAQ (K), iTRAQ (N-term), MMTS (C), variable, oxidation (M), and iTRAQ (Y). The MS tolerance was 0.2 D and the MSMS tolerance 0.5 D. The Mascot search results comprise a list of peptide identifications, each of which has a score that indicates the quality of the result. To determine the minimum peptide Mascot score for accurate protein identification, each peak list was searched against a version of the CP database in which the protein sequences were reversed. The identifications that resulted from the reversed database search were used to calculate the false protein identification rate: false protein identification rate = number of proteins identified from the reversed search/number of proteins identified from the normal search  $\times 100$ . Mascot peptide scores of at least 25 for proteins identified with two or more matched peptides and scores of at least 44 for identifications based on single peptides resulted in false protein identification rates of <1%. Normalized iTRAQ reporter ion ratios were calculated from the uncentroided peak lists using the recently developed i-Tracker software (Shadforth et al., 2005). Normalized reporter ion areas were calculated as follows: normalized area  $A = \text{area } A / (\text{area } A + \text{area } B + \text{area } C + \text{area } D)$ . The Genome Annotating Proteome Pipeline (GAPP) system ([www.ccbitt.org/gapp](http://www.ccbitt.org/gapp)) was used to parse peptide identification and scoring information from the Mascot output files and link these to the quantitation data in a relational database (MySQL version 4.0, MySQL AB). Peptides were quantified if at least three of the reporter ion peaks were above a threshold of 10 counts and if they had a Mascot score of at least 20. In addition, only peptides that were unique to a single identified protein were quantified.

Averaged normalized areas were used to calculate the relative abundance of proteins in control and mock CCVs, which was expressed as an average ratio [con/mock], using the following formula:  $([A_{116}/A_{114}] + [A_{116}/A_{115}] + [A_{117}/A_{114}] + [A_{117}/A_{115}])/4$ . ( $A_{116}$  and  $A_{117}$  correspond to control CCVs and  $A_{114}$  and  $A_{115}$  to mock CCVs.) Proteins were ranked according to ratios. Ratios were

normalized by division by 2.5, to obtain a ratio of ~1 for the center point of the distribution (protein no. 261). These normalized ratios were used for the plot (ratio over rank) as shown in Fig. 3.

An inherent difficulty of iTRAQ is the nontrivial data analysis, as well as the considerable processing time required for the mass-spectrometric analysis. Hence, the iTRAQ data discussed in this study was derived from a single pair of control and mock CCV fractions, analyzed in duplicate. However, this particular pair of CCVs was probed by Western blot for >20 different marker proteins, including CCV and non-CCV proteins. All of them showed enrichment or depletion as expected (unpublished data). This as well as the consistency with the DIGE and Western blot data make it very likely that the iTRAQ data presented here are highly representative.

## References

- Advani, R.J., B. Yang, R. Prekeris, K.C. Lee, J. Klumperman, and R.H. Scheller. 1999. VAMP-7 mediates vesicular transport from endosomes to lysosomes. *J. Cell Biol.* 146:765–776.
- Ball, C.L., S.P. Hunt, and M.S. Robinson. 1995. Expression and localization of alpha-adaptin isoforms. *J. Cell Sci.* 108:2865–28675.
- Boehm, A., R. Galvin, and A. Sickmann. 2004. Extractor for ESI quadrupole TOF tandem MS data enabled for high throughput batch processing. *BMC Bioinformatics.* 5:162.
- Hay, J.C., D.S. Chao, C.S. Kuo, and R.H. Scheller. 1997. Protein interactions regulating vesicle transport between the endoplasmic reticulum and Golgi apparatus in mammalian cells. *Cell.* 89:149–158.
- Hirst, J., A. Motley, K. Harasaki, S.Y. Peak Chew, and M.S. Robinson. 2003. EpsinR: an ENTH domain-containing protein that interacts with AP-1. *Mol. Biol. Cell.* 14:625–641. (published erratum appears in *Mol. Biol. Cell.* 2003. 14: 1743)
- Nazarian, R., M. Starcevic, M.J. Spencer, and E.C. Dell'Angelica. 2006. Reinvestigation of the dysbindin subunit of BLOC-1 (biogenesis of lysosome-related organelles complex-1) as a dystrobrevin-binding protein. *Biochem. J.* 395:587–598.
- Page, L.J., and M.S. Robinson. 1995. Targeting signals and subunit interactions in coated vesicle adaptor complexes. *J. Cell Biol.* 131:619–630.
- Seaman, M.N., P.J. Sowerby, and M.S. Robinson. 1996. Cytosolic and membrane-associated proteins involved in the recruitment of AP-1 adaptors onto the trans-Golgi network. *J. Biol. Chem.* 271:25446–25451.
- Shadforth, I.P., T.P. Dunkley, K.S. Lilley, and C. Bessant. 2005. i-Tracker: for quantitative proteomics using iTRAQ. *BMC Genomics.* 6:145.
- Shevchenko, A., M. Wilm, O. Vorm, and M. Mann. 1996. Mass spectrometric sequencing of proteins from silver-stained polyacrylamide gels. *Anal. Chem.* 68:850–858.
- Steegmaier, M., J. Klumperman, D.L. Foletti, J.S. Yoo, and R.H. Scheller. 1999. Vesicle-associated membrane protein 4 is implicated in trans-Golgi network vesicle trafficking. *Mol. Biol. Cell.* 10:1957–1972.
- Steegmaier, M., V. Oorschot, J. Klumperman, and R.H. Scheller. 2000. Syntaxin 17 is abundant in steroidogenic cells and implicated in smooth endoplasmic reticulum membrane dynamics. *Mol. Biol. Cell.* 11:2719–2731.
- Unlu, M., M.E. Morgan, and J.S. Minden. 1997. Difference gel electrophoresis: a single gel method for detecting changes in protein extracts. *Electrophoresis.* 18: 2071–2077.

Table S1. Complete list of proteins quantified by iTRAQ

| Rank | Protein ID  | Protein name                                                        | Mascot score | Peptides quantified | Control/mock ratio | SD   |
|------|-------------|---------------------------------------------------------------------|--------------|---------------------|--------------------|------|
| 1    | gi 30582397 | AP-1 $\sigma$ 1A                                                    | 96           | 1                   | 12.24              | 5.13 |
| 2    | gi 32451593 | Clathrin heavy chain (CHC17)                                        | 1826         | 30                  | 6.27               | 1.46 |
| 3    | gi 30582933 | DNase II (lysosomal)                                                | 63           | 1                   | 5.01               | 1.09 |
| 4    | gi 1363934  | Dynamin-2                                                           | 569          | 11                  | 4.83               | 1.31 |
| 5    | gi 41016993 | EpsinR/Enthoprotin                                                  | 478          | 10                  | 4.59               | 1.31 |
| 6    | gi 17028334 | AP-1 $\mu$ 1A                                                       | 379          | 8                   | 4.59               | 1.08 |
| 7    | gi 56203491 | TPD52L1                                                             | 104          | 1                   | 4.45               | 1.24 |
| 8    | gi 12643391 | AP-1 $\gamma$                                                       | 540          | 18                  | 4.37               | 1.05 |
| 9    | gi 3294548  | Cathepsin Z (lysosomal)                                             | 102          | 2                   | 4.10               | 1.19 |
| 10   | gi 38570101 | Unknown protein (RAB-GAP domain)                                    | 45           | 3                   | 4.05               | 0.98 |
| 11   | gi 1335854  | Clathrin heavy chain homologue (CHC22)                              | 558          | 1                   | 3.84               | 1.09 |
| 12   | gi 17402231 | Clathrin light chain a                                              | 231          | 9                   | 3.81               | 1.02 |
| 13   | gi 2143260  | PI 3-kinase C2 $\alpha$                                             | 822          | 11                  | 3.62               | 1.03 |
| 14   | gi 55662275 | Cl-Mannose 6-phosphate receptor                                     | 668          | 14                  | 3.53               | 0.85 |
| 15   | gi 70608172 | TPD52                                                               | 160          | 1                   | 3.52               | 0.85 |
| 16   | gi 25090897 | CALM                                                                | 258          | 5                   | 3.43               | 0.94 |
| 17   | gi 21903712 | Carboxypeptidase D                                                  | 406          | 7                   | 3.41               | 0.93 |
| 18   | gi 116505   | Clathrin light chain b                                              | 171          | 9                   | 3.39               | 0.77 |
| 19   | gi 2226273  | TGN46                                                               | 163          | 1                   | 3.30               | 0.75 |
| 20   | gi 33150596 | AP-1 $\sigma$ 1B                                                    | 49           | 1                   | 3.20               | 0.74 |
| 21   | gi 55663531 | Syntaxin 6                                                          | 121          | 1                   | 3.15               | 0.78 |
| 22   | gi 13477131 | Sorting nexin 9                                                     | 260          | 6                   | 3.07               | 0.79 |
| 23   | gi 56205909 | Rab4A                                                               | 319          | 4                   | 2.78               | 0.71 |
| 24   | gi 62287155 | NECAP-1                                                             | 66           | 1                   | 2.75               | 0.86 |
| 25   | gi 182516   | Ferritin light subunit                                              | 131          | 3                   | 2.67               | 0.57 |
| 26   | gi 14043007 | AP-1 $\beta$ 1                                                      | 1020         | 8                   | 2.60               | 0.73 |
| 27   | gi 2827434  | Sorting nexin 2                                                     | 403          | 4                   | 2.58               | 0.54 |
| 28   | gi 9716092  | Sortilin                                                            | 125          | 2                   | 2.53               | 0.77 |
| 29   | gi 66932909 | <i>Pumilio 1</i>                                                    | 105          | 1                   | 2.46               | 0.74 |
| 30   | gi 8546849  | CD-Mannose 6-phosphate receptor                                     | 152          | 5                   | 2.44               | 0.63 |
| 31   | gi 67477390 | Inositolpolyphosphate 5-phosphatase OCRL-1                          | 581          | 8                   | 2.40               | 0.61 |
| 32   | gi 2337920  | Syntaxin 7                                                          | 220          | 3                   | 2.38               | 0.61 |
| 33   | gi 47125326 | Ferritin heavy chain                                                | 84           | 5                   | 2.37               | 0.77 |
| 34   | gi 55958410 | <i>Argininosuccinate synthetase</i>                                 | 176          | 5                   | 2.37               | 0.62 |
| 35   | gi 8922952  | Cappuccino                                                          | 73           | 1                   | 2.36               | 0.79 |
| 36   | gi 47086495 | BLOC-1, subunit 3                                                   | 96           | 3                   | 2.35               | 0.58 |
| 37   | gi 56205243 | Auxilin                                                             | 150          | 3                   | 2.33               | 0.63 |
| 38   | gi 7920147  | <i>N</i> -ethylmaleimide-sensitive factor (NSF)                     | 63           | 1                   | 2.33               | 0.64 |
| 39   | gi 4557469  | AP-2 $\beta$ 2                                                      | 831          | 7                   | 2.32               | 0.66 |
| 40   | gi 57162630 | AP-3 $\mu$ 3A                                                       | 90           | 1                   | 2.31               | 0.46 |
| 41   | gi 15489411 | AP-2 $\mu$ 2                                                        | 121          | 4                   | 2.31               | 0.67 |
| 42   | gi 54695838 | Rab5C                                                               | 311          | 5                   | 2.29               | 0.55 |
| 43   | gi 62751805 | D19                                                                 | 88           | 2                   | 2.29               | 0.47 |
| 44   | gi 15214676 | Unknown protein (putative Rab interactor)                           | 62           | 1                   | 2.28               | 0.50 |
| 45   | gi 4433649  | Syntaxin 8                                                          | 122          | 2                   | 2.21               | 0.52 |
| 46   | gi 13543973 | <i>IMP (inosine monophosphate dehydrogenase) 2</i>                  | 510          | 15                  | 2.17               | 0.55 |
| 47   | gi 9557955  | Sorting nexin 5                                                     | 206          | 3                   | 2.15               | 0.61 |
| 48   | gi 17375734 | GAK/auxilin2                                                        | 288          | 3                   | 2.12               | 0.64 |
| 49   | gi 15214696 | Glucosamine (N-acetyl)-6-sulfatase (lysosomal)                      | 162          | 4                   | 2.11               | 0.58 |
| 50   | gi 13431563 | Huntingtin interacting protein 1 related (Hip1R)                    | 210          | 1                   | 2.09               | 0.81 |
| 51   | gi 1184699  | <i>tyrosyl-tRNA synthetase</i>                                      | 47           | 1                   | 2.06               | 0.61 |
| 52   | gi 30582345 | Snapin                                                              | 48           | 1                   | 2.05               | 0.53 |
| 53   | gi 19913414 | AP-2 $\alpha$                                                       | 388          | 7                   | 2.03               | 0.46 |
| 54   | gi 3024589  | BLOC-1, subunit 1                                                   | 138          | 2                   | 1.98               | 0.54 |
| 55   | gi 16307067 | Activated RNA polymerase II transcription cofactor 4                | 100          | 3                   | 1.96               | 0.50 |
| 56   | gi 55249561 | Protein kinase Njmu-R1                                              | 72           | 2                   | 1.92               | 0.55 |
| 57   | gi 14714586 | ADP-Ribosylation Factor 1 (ARF1)                                    | 218          | 3                   | 1.90               | 0.46 |
| 58   | gi 32965400 | Dysbindin                                                           | 146          | 4                   | 1.90               | 0.44 |
| 59   | gi 62896680 | Sorting nexin 1                                                     | 126          | 1                   | 1.88               | 0.57 |
| 60   | gi 11125673 | TPD52L2                                                             | 243          | 2                   | 1.78               | 0.44 |
| 61   | gi 18203690 | Solute carrier family12 (potassium/chloride transporters), member 4 | 185          | 3                   | 1.76               | 0.52 |
| 62   | gi 18653904 | Vacuolar-type H(+)-ATPase                                           | 115          | 1                   | 1.76               | 0.41 |
| 63   | gi 44890366 | Coatomer protein complex, subunit $\gamma$ 1                        | 305          | 4                   | 1.75               | 0.45 |
| 64   | gi 30583499 | Phosphatidylinositol 4-kinase type II                               | 240          | 5                   | 1.74               | 0.58 |
| 65   | gi 15679932 | ETF1 protein                                                        | 215          | 3                   | 1.72               | 0.33 |
| 66   | gi 15072481 | LOH12CR1                                                            | 78           | 2                   | 1.70               | 0.50 |
| 67   | gi 60593497 | Bet3                                                                | 103          | 2                   | 1.69               | 0.42 |
| 68   | gi 10443244 | SH3-domain GRB2-like endophilin B1                                  | 195          | 4                   | 1.68               | 0.43 |
| 69   | gi 15741221 | Unknown protein                                                     | 129          | 3                   | 1.67               | 0.42 |
| 70   | gi 4689252  | Sorting nexin 6                                                     | 204          | 4                   | 1.67               | 0.45 |
| 71   | gi 46558847 | BLOC-1, subunit 2                                                   | 78           | 2                   | 1.66               | 0.41 |
| 72   | gi 7706441  | VPS29                                                               | 112          | 4                   | 1.64               | 0.40 |
| 73   | gi 30582953 | RuvB-like 1                                                         | 472          | 7                   | 1.63               | 0.43 |
| 74   | gi 55957331 | Rab14                                                               | 313          | 5                   | 1.62               | 0.43 |
| 75   | gi 3005742  | Unknown protein                                                     | 70           | 2                   | 1.62               | 0.38 |
| 76   | gi 1255188  | Dynamin                                                             | 122          | 3                   | 1.61               | 0.41 |
| 77   | gi 28422140 | Rab4B                                                               | 106          | 1                   | 1.57               | 0.44 |
| 78   | gi 13543574 | Vesicle-associated membrane protein 3 (VAMP3; cellubrevin)          | 173          | 1                   | 1.57               | 0.53 |
| 79   | gi 563886   | $\beta$ -Centractin                                                 | 96           | 2                   | 1.56               | 0.48 |
| 80   | gi 57999523 | Unknown protein                                                     | 341          | 8                   | 1.53               | 0.41 |

|            |                     |                                                                |            |           |             |             |
|------------|---------------------|----------------------------------------------------------------|------------|-----------|-------------|-------------|
| 81         | gi 55960369         | Coatomer protein complex, subunit $\alpha$                     | 264        | 6         | 1.53        | 0.35        |
| 82         | gi 27503838         | TRAPPC5 protein                                                | 117        | 2         | 1.51        | 0.35        |
| 83         | gi 15011984         | Bystin                                                         | 92         | 3         | 1.48        | 0.43        |
| 84         | gi 46854518         | Proliferation-associated 2G4                                   | 159        | 4         | 1.48        | 0.41        |
| 85         | gi 51094839         | Coatomer protein complex, subunit $\gamma$ 2                   | 94         | 1         | 1.48        | 0.44        |
| 86         | gi 12653119         | Coatomer protein complex, subunit $\beta$ 2                    | 108        | 5         | 1.47        | 0.37        |
| 87         | gi 542837           | H <sup>+</sup> -exporting ATPase (EC3.6.3.6), chainD, vacuolar | 185        | 5         | 1.47        | 0.39        |
| 88         | gi 23512245         | AP-3 $\beta$ 3A                                                | 438        | 9         | 1.47        | 0.34        |
| 89         | gi 186629           | Keratin 10                                                     | 123        | 2         | 1.47        | 0.36        |
| 90         | gi 55959755         | OTTHUMP00000017090 (similar to ribosomal protein L29)          | 57         | 1         | 1.47        | 0.53        |
| 91         | gi 307121           | Low density lipoprotein receptor                               | 99         | 2         | 1.47        | 0.47        |
| 92         | gi 61212960         | Proteasome-associated protein ECM29                            | 1287       | 26        | 1.46        | 0.41        |
| 93         | gi 55665502         | VPS26                                                          | 180        | 6         | 1.46        | 0.39        |
| 94         | gi 12654697         | Transferrin receptor                                           | 953        | 20        | 1.46        | 0.38        |
| 95         | gi 15530265         | Eukaryotic translation elongation factor 1 $\gamma$            | 198        | 5         | 1.45        | 0.30        |
| 96         | gi 5326998          | Erythrocyte cytosolic protein of 51kDa (ECP-51)                | 573        | 13        | 1.45        | 0.37        |
| 97         | gi 3757822          | IkappaB kinase complex associated protein (IKAP)               | 316        | 11        | 1.44        | 0.37        |
| 98         | gi 62822514         | Unknown protein                                                | 224        | 7         | 1.43        | 0.38        |
| 99         | gi 33874734         | GSPT1 protein                                                  | 111        | 2         | 1.42        | 0.42        |
| 100        | gi 21040277         | Diacylglycerol lipase $\beta$                                  | 181        | 5         | 1.42        | 0.35        |
| 101        | gi 40555890         | Nin one binding protein                                        | 78         | 3         | 1.42        | 0.35        |
| 102        | gi 55664716         | WD repeat domain 11                                            | 103        | 4         | 1.42        | 0.40        |
| 103        | gi 31545            | Valyl-tRNA synthetase                                          | 281        | 5         | 1.42        | 0.35        |
| 104        | gi 2996192          | Vesicle-associated membrane protein (VAMP 8 or VAMP 5)         | 91         | 2         | 1.39        | 0.36        |
| 105        | gi 51474392         | Similar to 40S ribosomal protein S16                           | 74         | 1         | 1.39        | 0.32        |
| 106        | gi 6648106          | Ubiquitin-protein ligase E3A                                   | 56         | 1         | 1.38        | 0.37        |
| 107        | gi 337459           | Small nuclear ribonucleoprotein particle                       | 75         | 2         | 1.37        | 0.46        |
| 108        | gi 12005633         | NGT                                                            | 168        | 5         | 1.36        | 0.45        |
| 109        | gi 55661754         | Tripeptidyl peptidase II                                       | 1587       | 62        | 1.36        | 0.32        |
| 110        | gi 57209813         | Tubulin, $\beta$ polypeptide                                   | 689        | 1         | 1.34        | 0.32        |
| 111        | gi 307200           | Brain glycogen phosphorylase                                   | 865        | 29        | 1.34        | 0.31        |
| 112        | gi 1008856          | Ribosomal protein L34                                          | 138        | 4         | 1.34        | 0.34        |
| 113        | gi 17390260         | Rho GTPase activating protein 1                                | 80         | 1         | 1.33        | 0.53        |
| 114        | gi 32880009         | AP-3 $\sigma$ 3A                                               | 57         | 1         | 1.33        | 0.46        |
| 115        | gi 9651706          | HT014                                                          | 135        | 2         | 1.32        | 0.31        |
| 116        | gi 21619196         | Trafficking protein particle complex 1                         | 86         | 3         | 1.32        | 0.36        |
| 117        | gi 34327966         | KIAA0625 protein                                               | 66         | 2         | 1.32        | 0.29        |
| <b>118</b> | <b>gi 83302113</b>  | <b>DnaJ homolog subfamily C member 13 (RME8)</b>               | <b>821</b> | <b>12</b> | <b>1.31</b> | <b>0.33</b> |
| 119        | gi 21753189         | Unknown protein                                                | 148        | 4         | 1.31        | 0.38        |
| 120        | gi 5311171          | Csa-19                                                         | 86         | 3         | 1.31        | 0.38        |
| 121        | gi 55663551         | Rho/vrac guanine nucleotide exchange factor (GEF) 2            | 138        | 3         | 1.31        | 0.25        |
| 122        | gi 49456277         | PSME1                                                          | 387        | 8         | 1.31        | 0.30        |
| 123        | gi 10438450         | Unknown protein                                                | 371        | 7         | 1.30        | 0.29        |
| 124        | gi 48428689         | Leucyl-tRNA synthetase, cytoplasmic                            | 91         | 2         | 1.30        | 0.39        |
| 125        | gi 12653493         | Brain abundant, membrane attached signal protein 1             | 283        | 3         | 1.30        | 0.35        |
| 126        | gi 62822165         | Unknown protein                                                | 183        | 3         | 1.30        | 0.31        |
| 127        | gi 18089054         | ZNF277 protein                                                 | 47         | 1         | 1.29        | 0.31        |
| 128        | gi 25304086         | Rab5B                                                          | 193        | 1         | 1.28        | 0.49        |
| 129        | gi 38609748         | Down syndrome critical region protein 2                        | 119        | 3         | 1.28        | 0.39        |
| 130        | gi 42659817         | Similar to ribosomal protein S2                                | 190        | 1         | 1.28        | 0.36        |
| 131        | gi 55959864         | Nicastrin                                                      | 68         | 1         | 1.28        | 0.40        |
| 132        | gi 1346343          | Keratin, typeII cytoskeletal 1 (Cytokeratin1)                  | 316        | 4         | 1.28        | 0.33        |
| 133        | gi 47604944         | CVAK104                                                        | 213        | 2         | 1.27        | 0.37        |
| 134        | gi 56204408         | Transmembrane protein 9                                        | 65         | 1         | 1.27        | 0.48        |
| 135        | gi 14583268         | Cytoplasmic protein                                            | 104        | 1         | 1.27        | 0.28        |
| 136        | gi 33150526         | zeta-COP                                                       | 84         | 2         | 1.27        | 0.11        |
| 137        | gi 47940610         | Poly(rC)-binding protein 2                                     | 264        | 2         | 1.27        | 0.29        |
| <b>138</b> | <b>gi 106507164</b> | <b>Rab12</b>                                                   | <b>77</b>  | <b>2</b>  | <b>1.26</b> | <b>0.37</b> |
| 139        | gi 3164202          | Ribosomal protein L10                                          | 70         | 1         | 1.26        | 0.54        |
| 140        | gi 517222           | Ribosomal protein S24                                          | 61         | 2         | 1.25        | 0.36        |
| 141        | gi 41152237         | Muted                                                          | 52         | 2         | 1.25        | 0.28        |
| 142        | gi 38571606         | Ribosomal protein L23                                          | 127        | 2         | 1.25        | 0.39        |
| 143        | gi 12654681         | High-density lipoprotein binding protein                       | 89         | 2         | 1.25        | 0.43        |
| <b>144</b> | <b>gi 7243268</b>   | <b>FENS1</b>                                                   | <b>86</b>  | <b>2</b>  | <b>1.25</b> | <b>0.31</b> |
| 145        | gi 55961080         | Ribosomal protein S8                                           | 169        | 4         | 1.24        | 0.35        |
| 146        | gi 40889023         | Ribosomal protein L4                                           | 239        | 8         | 1.24        | 0.31        |
| 147        | gi 55665494         | PAI-1 mRNA-binding protein                                     | 68         | 2         | 1.22        | 0.27        |
| 148        | gi 16924231         | Ribosomal protein S19                                          | 93         | 2         | 1.22        | 0.35        |
| 149        | gi 55961090         | ADP-ribosylation factor-like 10B                               | 74         | 3         | 1.22        | 0.32        |
| 150        | gi 57284201         | FilaminA, $\alpha$ (actin binding protein 280)                 | 201        | 3         | 1.21        | 0.38        |
| 151        | gi 404015           | Ribosomal protein L23a                                         | 176        | 4         | 1.21        | 0.30        |
| 152        | gi 288100           | Initiation factor 4B                                           | 46         | 1         | 1.21        | 0.34        |
| 153        | gi 12654637         | Thioredoxin-like 1                                             | 345        | 11        | 1.20        | 0.32        |
| 154        | gi 66392203         | Nucleoside-diphosphate kinase 2                                | 168        | 4         | 1.20        | 0.20        |
| 155        | gi 5442368          | AP-4 $\sigma$ 4                                                | 76         | 1         | 1.20        | 0.29        |
| 156        | gi 17426453         | Ubiquilin 2                                                    | 92         | 1         | 1.20        | 0.39        |
| 157        | gi 37492            | $\alpha$ -Tubulin                                              | 490        | 7         | 1.19        | 0.22        |
| 158        | gi 14044037         | RPS11 protein                                                  | 105        | 5         | 1.19        | 0.36        |
| <b>159</b> | <b>gi 49457542</b>  | <b>Rab8A</b>                                                   | <b>207</b> | <b>1</b>  | <b>1.19</b> | <b>0.34</b> |
| 160        | gi 550019           | Ribosomal protein L28                                          | 62         | 2         | 1.19        | 0.28        |
| 161        | gi 407421           | SEB4B                                                          | 49         | 1         | 1.19        | 0.32        |
| 162        | gi 7582292          | BM-010                                                         | 105        | 1         | 1.19        | 0.38        |
| 163        | gi 18255173         | RPL27 protein                                                  | 85         | 4         | 1.18        | 0.29        |
| 164        | gi 56181368         | HSD48                                                          | 58         | 1         | 1.18        | 0.31        |

|     |             |                                                                   |            |           |             |             |
|-----|-------------|-------------------------------------------------------------------|------------|-----------|-------------|-------------|
| 165 | gi 56203109 | Ribosomal protein L22                                             | 152        | 4         | 1.18        | 0.35        |
| 166 | gi 292435   | Ribosomal protein L26                                             | 139        | 6         | 1.17        | 0.32        |
| 167 | gi 28625486 | Carbamoylphosphate synthetase                                     | 170        | 3         | 1.17        | 0.44        |
| 168 | gi 34192133 | PRPS2 protein                                                     | 166        | 4         | 1.17        | 0.30        |
| 169 | gi 39752567 | Tetanus insensitive vesicle-associated membrane protein (Ti-VAMP) | 93         | 1         | 1.17        | 0.33        |
| 170 | gi 47678643 | RANBP1                                                            | 57         | 1         | 1.17        | 0.28        |
| 171 | gi 66347408 | Proteasome 26S subunit, non-ATPase, 5                             | 90         | 2         | 1.16        | 0.34        |
| 172 | gi 21708110 | PHKB protein                                                      | 385        | 10        | 1.16        | 0.29        |
| 173 | gi 62896517 | Ribosomal protein S4                                              | 189        | 4         | 1.15        | 0.27        |
| 174 | gi 55959133 | Unknown protein                                                   | 158        | 4         | 1.15        | 0.30        |
| 175 | gi 2102696  | Karyopherin $\beta$ 3                                             | 62         | 1         | 1.15        | 0.34        |
| 176 | gi 550023   | Ribosomal protein S9                                              | 272        | 13        | 1.15        | 0.26        |
| 177 | gi 55960870 | Ubiquitination factor E4B                                         | 52         | 1         | 1.14        | 0.25        |
| 178 | gi 558528   | Proteasome subunit Y                                              | 174        | 8         | 1.14        | 0.27        |
| 179 | gi 17444701 | Similar to ribosomal protein L18a                                 | 77         | 3         | 1.14        | 0.30        |
| 180 | gi 32880069 | Endothelial differentiation-related factor 1                      | 53         | 1         | 1.14        | 0.41        |
| 181 | gi 15131403 | Similar to testis-specific protein PBS13                          | 73         | 1         | 1.14        | 0.26        |
| 182 | gi 41150652 | Similar to ribosomal protein S18                                  | 111        | 5         | 1.13        | 0.27        |
| 183 | gi 182642   | Rapamycin-binding protein                                         | 79         | 1         | 1.13        | 0.37        |
| 184 | gi 2832753  | Phosphorylase kinase $\gamma$ subunit                             | 111        | 3         | 1.13        | 0.26        |
| 185 | gi 41149143 | Similar to ribosomal protein L13a                                 | 237        | 8         | 1.12        | 0.25        |
| 186 | gi 55662798 | Valosin-containing protein                                        | 598        | 14        | 1.12        | 0.28        |
| 187 | gi 16877708 | RPL35A protein                                                    | 97         | 4         | 1.12        | 0.30        |
| 188 | gi 30583113 | Proteasome subunit, $\beta$ type, 2                               | 266        | 14        | 1.12        | 0.31        |
| 189 | gi 54696884 | Stress-induced-phosphoprotein1 (Hsp70/Hsp90organizingprotein)     | 494        | 15        | 1.12        | 0.28        |
| 190 | gi 81175191 | 60S ribosomal protein L5                                          | 133        | 6         | 1.11        | 0.27        |
| 191 | gi 42657272 | Similar to 40S ribosomal protein S25                              | 122        | 5         | 1.11        | 0.28        |
| 192 | gi 37675283 | AP-4 $\epsilon$                                                   | 90         | 3         | 1.11        | 0.22        |
| 193 | gi 62088766 | CD68 antigen                                                      | 172        | 4         | 1.11        | 0.28        |
| 194 | gi 7243183  | KIAA1401 protein                                                  | 119        | 3         | 1.11        | 0.28        |
| 195 | gi 56202651 | Microtubule-associated protein 7                                  | 188        | 4         | 1.11        | 0.30        |
| 196 | gi 6580116  | Glycogen-debranchingenzyme                                        | 1898       | 98        | 1.10        | 0.26        |
| 197 | gi 56204938 | AP-4 $\beta$ 4                                                    | 69         | 2         | 1.10        | 0.26        |
| 198 | gi 2323410  | Skb1Hs                                                            | 161        | 5         | 1.10        | 0.28        |
| 199 | gi 13436332 | RPL13 protein                                                     | 251        | 10        | 1.10        | 0.23        |
| 200 | gi 15559343 | Phosphorylase kinase, $\alpha$ 2                                  | 283        | 7         | 1.10        | 0.28        |
| 201 | gi 30583205 | Ubiquitin specific protease 14                                    | 257        | 9         | 1.10        | 0.27        |
| 202 | gi 435476   | Cytokeratin 9                                                     | 100        | 2         | 1.09        | 0.40        |
| 203 | gi 4689134  | 60S ribosomal protein L36                                         | 100        | 4         | 1.09        | 0.27        |
| 204 | gi 34532087 | Unknown protein                                                   | 109        | 4         | 1.09        | 0.25        |
| 205 | gi 4432754  | Ribosomal protein L27a                                            | 93         | 3         | 1.09        | 0.19        |
| 206 | gi 181402   | Epidermal cytokeatin 2                                            | 145        | 1         | 1.09        | 0.32        |
| 207 | gi 22766819 | RAVER1                                                            | 55         | 1         | 1.09        | 0.20        |
| 208 | gi 39645240 | HNRPU protein                                                     | 98         | 2         | 1.09        | 0.27        |
| 209 | gi 12654583 | Ribosomal protein P0                                              | 348        | 7         | 1.08        | 0.27        |
| 210 | gi 27368062 | Class IVb $\beta$ tubulin                                         | 561        | 3         | 1.08        | 0.33        |
| 211 | gi 2232243  | Secretory carrier membrane protein (SCAMP3)                       | 173        | 3         | 1.08        | 0.29        |
| 212 | gi 32879911 | Proteasome subunit, $\alpha$ type, 4                              | 390        | 25        | 1.08        | 0.29        |
| 213 | gi 41201737 | Similar to 40S ribosomal protein SA                               | 192        | 6         | 1.08        | 0.31        |
| 214 | gi 495126   | Ribosomal protein L11                                             | 120        | 2         | 1.08        | 0.25        |
| 215 | gi 2150046  | 26S proteasome subunit 9                                          | 714        | 38        | 1.08        | 0.27        |
| 216 | gi 55958183 | Ribosomal protein L7a                                             | 146        | 4         | 1.08        | 0.27        |
| 217 | gi 2580552  | Deadbox, X isoform                                                | 215        | 2         | 1.08        | 0.24        |
| 218 | gi 71891792 | KIAA0399 protein                                                  | 116        | 3         | 1.08        | 0.41        |
| 219 | gi 2134662  | 26S proteainase chain 5a                                          | 483        | 13        | 1.07        | 0.24        |
| 220 | gi 62897773 | Ribosomal protein S5 variant                                      | 144        | 2         | 1.07        | 0.29        |
| 221 | gi 4092058  | Proteasome subunit HSPC (PSMA7)                                   | 511        | 28        | 1.07        | 0.25        |
| 222 | gi 49456343 | <b>Rab11B</b>                                                     | <b>321</b> | <b>8</b>  | <b>1.06</b> | <b>0.27</b> |
| 223 | gi 55665593 | Eukaryotic translation elongation factor 1 $\alpha$ -like 3       | 313        | 17        | 1.06        | 0.25        |
| 224 | gi 619444   | Dihydrolipoamide acetyltransferase                                | 148        | 3         | 1.06        | 0.30        |
| 225 | gi 190447   | Prosomeal protein P30-33K                                         | 390        | 1         | 1.06        | 0.24        |
| 226 | gi 33329091 | Phosphonoformate immunoassociated protein 4                       | 457        | 14        | 1.05        | 0.23        |
| 227 | gi 4105819  | <b>Rab7</b>                                                       | <b>324</b> | <b>7</b>  | <b>1.05</b> | <b>0.27</b> |
| 228 | gi 28374352 | RPS15A protein                                                    | 124        | 5         | 1.05        | 0.29        |
| 229 | gi 3153908  | Liver glycogen phosphorylase                                      | 1137       | 23        | 1.05        | 0.26        |
| 230 | gi 48145757 | PSMB4 proteasome subunit, $\beta$ type, 4                         | 332        | 9         | 1.05        | 0.24        |
| 231 | gi 37574023 | Proteasome 26S non-ATPase subunit 8                               | 256        | 15        | 1.05        | 0.27        |
| 232 | gi 460771   | hnRNP-E1                                                          | 224        | 2         | 1.04        | 0.29        |
| 233 | gi 30583143 | Adenylyl cyclase-associated protein                               | 136        | 3         | 1.04        | 0.26        |
| 234 | gi 15278174 | Proteasome $\beta$ 3 subunit                                      | 252        | 18        | 1.04        | 0.29        |
| 235 | gi 15214948 | Proteasome 26S non-ATPase subunit 7                               | 282        | 17        | 1.03        | 0.29        |
| 236 | gi 62286617 | Aftiphilin                                                        | 89         | 1         | 1.03        | 0.29        |
| 237 | gi 1228049  | Multifunctional protein CAD                                       | 1429       | 33        | 1.03        | 0.25        |
| 238 | gi 3618343  | 26S proteasome subunit p40.5                                      | 689        | 32        | 1.03        | 0.25        |
| 239 | gi 30410796 | Proteasome activator subunit 3                                    | 239        | 5         | 1.03        | 0.24        |
| 240 | gi 20810439 | Proteasome $\alpha$ 3 subunit                                     | 365        | 13        | 1.03        | 0.27        |
| 241 | gi 6731237  | <b>Myoferlin</b>                                                  | <b>643</b> | <b>14</b> | <b>1.02</b> | <b>0.26</b> |
| 242 | gi 51095158 | Synaptophysin-like protein                                        | 63         | 8         | 1.02        | 0.23        |
| 243 | gi 31973    | Unknown protein                                                   | 45         | 1         | 1.02        | 0.34        |
| 244 | gi 30582133 | Proteasome subunit, $\alpha$ type, 1                              | 415        | 2         | 1.02        | 0.25        |
| 245 | gi 3197223  | Acidic ribosomal phosphoprotein P1                                | 104        | 2         | 1.02        | 0.22        |
| 246 | gi 11610605 | Testis-specific poly(A)-binding protein                           | 87         | 1         | 1.02        | 0.20        |
| 247 | gi 30583597 | Ribosomal protein L8                                              | 54         | 1         | 1.02        | 0.28        |

|     |             |                                                                |            |           |             |             |
|-----|-------------|----------------------------------------------------------------|------------|-----------|-------------|-------------|
| 248 | gi 30583275 | Proteasome subunit, $\beta$ type, 7 (PSMB7)                    | 161        | 7         | 1.02        | 0.25        |
| 249 | gi 12653473 | Proteasome $\beta$ 1 subunit                                   | 239        | 14        | 1.02        | 0.24        |
| 250 | gi 14714524 | Proteasome 26S ATPase subunit 4                                | 310        | 10        | 1.01        | 0.26        |
| 251 | gi 17512153 | Proteasome 26S non-ATPase subunit 12                           | 804        | 27        | 1.01        | 0.24        |
| 252 | gi 976227   | 26S proteasome subunit p45                                     | 905        | 28        | 1.01        | 0.24        |
| 253 | gi 1808578  | Proteasome subunit p112                                        | 757        | 6         | 1.01        | 0.19        |
| 254 | gi 7023651  | Unknown protein                                                | 52         | 1         | 1.01        | 0.20        |
| 255 | gi 42490917 | 26S proteasome-associated pad1 homologue                       | 324        | 15        | 1.01        | 0.26        |
| 256 | gi 62241042 | Glutamyl-prolyl tRNA synthetase                                | 204        | 5         | 1.01        | 0.25        |
| 257 | gi 20379122 | Small GTP-binding protein RhoG                                 | 99         | 1         | 1.00        | 0.28        |
| 258 | gi 18204442 | Ribosomal protein L18                                          | 210        | 6         | 1.00        | 0.26        |
| 259 | gi 52632425 | Threonyl-tRNA synthetase                                       | 96         | 2         | 1.00        | 0.33        |
| 260 | gi 12274840 | ADRM1                                                          | 70         | 1         | 1.00        | 0.21        |
| 261 | gi 45594399 | CTD-like phosphatase domain-containing protein                 | 89         | 2         | 1.00        | 0.25        |
| 262 | gi 4432748  | Ribosomal protein S27                                          | 71         | 1         | 1.00        | 0.24        |
| 263 | gi 33150538 | <b>Rab10</b>                                                   | <b>180</b> | <b>3</b>  | <b>1.00</b> | <b>0.31</b> |
| 264 | gi 296736   | Macropain subunit iota                                         | 309        | 16        | 0.99        | 0.25        |
| 265 | gi 28422545 | UDP-glucose pyrophosphorylase 2                                | 357        | 9         | 0.99        | 0.26        |
| 266 | gi 13606056 | DNA dependent protein kinase catalytic subunit                 | 58         | 1         | 0.99        | 0.29        |
| 267 | gi 6941766  | Ubiquitin-conjugating enzyme E2N-like                          | 109        | 2         | 0.99        | 0.24        |
| 268 | gi 496895   | Glycogenin                                                     | 117        | 4         | 0.98        | 0.24        |
| 269 | gi 345717   | 26S proteasome regulatory chain 4                              | 493        | 13        | 0.98        | 0.28        |
| 270 | gi 31108    | EF-2                                                           | 544        | 13        | 0.98        | 0.22        |
| 271 | gi 55959947 | Protein kinase, cAMP-dependent, catalytic, $\beta$             | 63         | 1         | 0.97        | 0.25        |
| 272 | gi 115206   | C-1-tetrahydrofolate synthase, cytoplasmic                     | 287        | 4         | 0.97        | 0.22        |
| 273 | gi 1526426  | Proteasome subunit p42                                         | 592        | 17        | 0.97        | 0.22        |
| 274 | gi 312803   | Cdk2                                                           | 80         | 1         | 0.97        | 0.21        |
| 275 | gi 951338   | CAS                                                            | 202        | 6         | 0.97        | 0.21        |
| 276 | gi 51493358 | Similar to 40S ribosomal protein S16                           | 152        | 4         | 0.96        | 0.24        |
| 277 | gi 56205096 | <b>Phosphoglycerate dehydrogenase</b>                          | <b>498</b> | <b>12</b> | <b>0.96</b> | <b>0.24</b> |
| 278 | gi 54696890 | Tyrosine 3-mono-oxygenase $\theta$ subunit                     | 237        | 2         | 0.95        | 0.26        |
| 279 | gi 16306837 | TCPI, subunit 5 ( $\epsilon$ )                                 | 689        | 26        | 0.95        | 0.21        |
| 280 | gi 21619421 | Ribosomal protein S2                                           | 168        | 1         | 0.95        | 0.30        |
| 281 | gi 41472112 | Unknown protein                                                | 824        | 32        | 0.95        | 0.24        |
| 282 | gi 5726310  | 14-3-3 $\gamma$ protein                                        | 186        | 1         | 0.95        | 0.23        |
| 283 | gi 56181387 | STIP1 homology and U-box containing protein 1                  | 71         | 3         | 0.95        | 0.21        |
| 284 | gi 16741043 | MRCL3 protein                                                  | 264        | 9         | 0.95        | 0.24        |
| 285 | gi 306891   | 90-kD heat shock protein                                       | 831        | 31        | 0.95        | 0.24        |
| 286 | gi 38382891 | Rab43                                                          | 70         | 1         | 0.95        | 0.32        |
| 287 | gi 28704029 | Protein phosphatase 1, regulatory subunit 3D (PPP1R3D)         | 113        | 1         | 0.95        | 0.38        |
| 288 | gi 13559060 | MEP50 protein                                                  | 103        | 2         | 0.94        | 0.22        |
| 289 | gi 48146259 | CCT2                                                           | 756        | 35        | 0.94        | 0.23        |
| 290 | gi 126376   | LAMP-1                                                         | 103        | 4         | 0.94        | 0.22        |
| 291 | gi 13623199 | ATP citrate lyase                                              | 742        | 19        | 0.94        | 0.24        |
| 292 | gi 19070472 | Retinoblastoma-associated factor 600                           | 1845       | 50        | 0.94        | 0.22        |
| 293 | gi 2648022  | HLA classII region expressed gene KE2                          | 104        | 2         | 0.94        | 0.30        |
| 294 | gi 4929609  | CGI-70 protein                                                 | 491        | 20        | 0.93        | 0.21        |
| 295 | gi 187387   | Myristoylated alanine-rich C-kinase substrate                  | 177        | 2         | 0.93        | 0.18        |
| 296 | gi 37267    | Transketolase                                                  | 135        | 5         | 0.93        | 0.24        |
| 297 | gi 23821872 | Myosin-I (C/E)                                                 | 173        | 2         | 0.93        | 0.28        |
| 298 | gi 48257068 | HSPA8 protein                                                  | 565        | 2         | 0.92        | 0.26        |
| 299 | gi 62896799 | Eukaryotic translation initiation factor 3, subunit 3 $\gamma$ | 128        | 2         | 0.92        | 0.29        |
| 300 | gi 62131678 | 14-3-3 protein $\epsilon$                                      | 205        | 2         | 0.92        | 0.23        |
| 301 | gi 12803639 | Tubulin, $\beta$ 6                                             | 349        | 2         | 0.92        | 0.30        |
| 302 | gi 183355   | Glycogen synthase                                              | 787        | 40        | 0.92        | 0.23        |
| 303 | gi 62896535 | Guanine nucleotide binding protein                             | 209        | 6         | 0.92        | 0.23        |
| 304 | gi 54673670 | Twinfilin                                                      | 69         | 3         | 0.91        | 0.25        |
| 305 | gi 306890   | Chaperonin (HSP60)                                             | 190        | 4         | 0.91        | 0.21        |
| 306 | gi 12667788 | Myosin, heavy polypeptide 9, nonmuscle                         | 2054       | 36        | 0.91        | 0.22        |
| 307 | gi 671527   | Gamma subunit of CCT chaperonin                                | 738        | 50        | 0.91        | 0.22        |
| 308 | gi 337760   | Cerebroside sulfate activator protein                          | 83         | 2         | 0.91        | 0.28        |
| 309 | gi 806854   | eIF-2B $\epsilon$                                              | 59         | 1         | 0.91        | 0.35        |
| 310 | gi 704416   | Elongation factor Tu                                           | 72         | 2         | 0.91        | 0.26        |
| 311 | gi 41350401 | Migration-inducing gene 10 protein                             | 100        | 3         | 0.91        | 0.25        |
| 312 | gi 2370149  | PDZ domain protein                                             | 97         | 4         | 0.90        | 0.22        |
| 313 | gi 33438760 | Myosin heavy chain                                             | 258        | 1         | 0.90        | 0.24        |
| 314 | gi 62896539 | Chaperonin containing TCP1, subunit 8                          | 1234       | 59        | 0.90        | 0.21        |
| 315 | gi 5670324  | Gps1                                                           | 226        | 5         | 0.89        | 0.19        |
| 316 | gi 51094672 | Ubiquitin protein ligase E3C                                   | 186        | 4         | 0.89        | 0.24        |
| 317 | gi 337580   | Ribosomal protein L3                                           | 140        | 4         | 0.89        | 0.22        |
| 318 | gi 188590   | Myosin light chain 3                                           | 167        | 5         | 0.89        | 0.17        |
| 319 | gi 52001478 | TCP1-delta                                                     | 938        | 32        | 0.88        | 0.20        |
| 320 | gi 1465751  | VHL binding protein-1                                          | 199        | 4         | 0.88        | 0.20        |
| 321 | gi 12275866 | Tripartite motif protein TRIM29 $\beta$                        | 66         | 1         | 0.88        | 0.22        |
| 322 | gi 71891685 | KIAA0829protein; TIP120                                        | 230        | 5         | 0.88        | 0.20        |
| 323 | gi 33875694 | Aspartyl-aminopeptidase                                        | 116        | 3         | 0.88        | 0.17        |
| 324 | gi 683580   | Ribonucleoprotein, 68 kD (U1)                                  | 78         | 2         | 0.88        | 0.23        |
| 325 | gi 48145555 | CCT7                                                           | 839        | 29        | 0.87        | 0.21        |
| 326 | gi 55962551 | Heatshock protein 1A (70 kD)                                   | 510        | 7         | 0.87        | 0.21        |
| 327 | gi 36796    | T-complex polypeptide 1                                        | 841        | 56        | 0.87        | 0.20        |
| 328 | gi 1336765  | Glucosephosphate isomerase                                     | 118        | 3         | 0.87        | 0.22        |
| 329 | gi 559330   | KIAA0077                                                       | 213        | 6         | 0.87        | 0.20        |
| 330 | gi 11125348 | Putative protein kinase                                        | 79         | 1         | 0.87        | 0.26        |
| 331 | gi 50345286 | Dynein, cytoplasmic, heavy polypeptide 1                       | 366        | 10        | 0.87        | 0.24        |

|            |                    |                                                                    |            |          |             |             |
|------------|--------------------|--------------------------------------------------------------------|------------|----------|-------------|-------------|
| 332        | gi 20147659        | ADP-ribosylation factor protein 4                                  | 138        | 2        | 0.87        | 0.12        |
| 333        | gi 1170683         | Phosphorylase b kinase $\alpha$ regulatory chain                   | 69         | 3        | 0.87        | 0.31        |
| 334        | gi 14517632        | Acute morphine dependence related protein 2 chaperone              | 928        | 40       | 0.86        | 0.24        |
| 335        | gi 24234686        | Heatshock 70-kD protein 8                                          | 676        | 2        | 0.86        | 0.22        |
| 336        | gi 18307485        | Myosin-1F                                                          | 108        | 1        | 0.86        | 0.23        |
| 337        | gi 499719          | Mitochondrial dihydrolipoamide succinyl transferase                | 144        | 3        | 0.86        | 0.21        |
| 338        | gi 2959876         | Synaptogyrin 2                                                     | 133        | 4        | 0.85        | 0.25        |
| 339        | gi 30582627        | Eukaryotic translation initiation factor 3, subunit 5 $\epsilon$   | 133        | 2        | 0.85        | 0.10        |
| 340        | gi 49065418        | BAG2                                                               | 179        | 3        | 0.85        | 0.16        |
| 341        | gi 62088644        | Eukaryotic translation initiation factor 2B, subunit4 delta        | 170        | 3        | 0.85        | 0.24        |
| 342        | gi 5410300         | COP9 complex subunit 4                                             | 113        | 2        | 0.85        | 0.15        |
| 343        | gi 1352618         | 2-oxoglutarate dehydrogenase E1 component, mitochondrial precursor | 77         | 1        | 0.84        | 0.23        |
| 344        | gi 223582          | Histone H4                                                         | 76         | 1        | 0.84        | 0.20        |
| 345        | gi 30582227        | Programmed cell death 5                                            | 107        | 2        | 0.84        | 0.21        |
| <b>346</b> | <b>gi 54695928</b> | <b>Rab1A</b>                                                       | <b>479</b> | <b>4</b> | <b>0.84</b> | <b>0.26</b> |
| 347        | gi 55662967        | Golgi-specific brefeldin A resistance factor 1                     | 131        | 1        | 0.83        | 0.21        |
| <b>348</b> | <b>gi 13560109</b> | <b>ARF1 GAP</b>                                                    | <b>165</b> | <b>3</b> | <b>0.83</b> | <b>0.18</b> |
| 349        | gi 88974153        | Unknown protein LOC23045                                           | 68         | 3        | 0.83        | 0.27        |
| 350        | gi 55666249        | Phosphofruktokinase                                                | 168        | 2        | 0.83        | 0.18        |
| 351        | gi 940536          | P1Cdc21 protein                                                    | 47         | 2        | 0.83        | 0.21        |
| 352        | gi 2791552         | Tyrosine 3 mono-oxygenase $\beta$ subunit                          | 257        | 3        | 0.83        | 0.23        |
| 353        | gi 2209276         | Oxytocinase                                                        | 90         | 4        | 0.82        | 0.20        |
| <b>354</b> | <b>gi 62913988</b> | <b>Vac14</b>                                                       | <b>199</b> | <b>3</b> | <b>0.82</b> | <b>0.21</b> |
| 355        | gi 62089410        | Thrombospondin 1 precursor                                         | 147        | 3        | 0.81        | 0.23        |
| 356        | gi 12803097        | DnaJ (Hsp40) homologue, subfamilyB, member 1                       | 119        | 3        | 0.81        | 0.21        |
| 357        | gi 6634031         | KIAA0406 protein                                                   | 149        | 3        | 0.81        | 0.25        |
| 358        | gi 36065           | M1 subunit of ribonucleotide reductase                             | 168        | 3        | 0.81        | 0.23        |
| 359        | gi 5231133         | Ubiquitin-specific protease homologue                              | 79         | 2        | 0.81        | 0.23        |
| 360        | gi 38648667        | Fatty acid synthase                                                | 1870       | 46       | 0.81        | 0.20        |
| 361        | gi 7662446         | Unknown protein LOC22832                                           | 54         | 1        | 0.80        | 0.29        |
| 362        | gi 40788956        | Unknown protein KIAA0111                                           | 112        | 1        | 0.80        | 0.14        |
| 363        | gi 5262359         | C14orf3 protein                                                    | 57         | 1        | 0.80        | 0.17        |
| 364        | gi 31416724        | DnaJ C7 protein                                                    | 277        | 7        | 0.80        | 0.20        |
| 365        | gi 4960030         | Rab GDP dissociation inhibitor $\beta$                             | 49         | 1        | 0.80        | 0.22        |
| 366        | gi 5922017         | AMP deaminase                                                      | 117        | 2        | 0.80        | 0.25        |
| 367        | gi 3212110         | Prefoldin subunit 1                                                | 142        | 4        | 0.79        | 0.20        |
| 368        | gi 31179           | Enolase                                                            | 121        | 2        | 0.79        | 0.14        |
| 369        | gi 55959886        | Peroxisredoxin 1                                                   | 402        | 9        | 0.79        | 0.21        |
| <b>370</b> | <b>gi 46577636</b> | <b>Rab-2A</b>                                                      | <b>119</b> | <b>2</b> | <b>0.79</b> | <b>0.22</b> |
| 371        | gi 57284174        | Ubiquitin-like 4                                                   | 82         | 2        | 0.79        | 0.17        |
| 372        | gi 21903479        | Vinculin                                                           | 136        | 2        | 0.78        | 0.31        |
| 373        | gi 17939425        | PAICS protein                                                      | 283        | 8        | 0.78        | 0.19        |
| 374        | gi 30583309        | TIP47                                                              | 100        | 2        | 0.78        | 0.22        |
| 375        | gi 532313          | NF45 protein                                                       | 80         | 1        | 0.78        | 0.15        |
| 376        | gi 12654931        | Protein disulfide isomerase associated protein 6                   | 96         | 2        | 0.77        | 0.28        |
| 377        | gi 55959870        | Rab3 GTPase-activating protein, noncatalytic subunit               | 202        | 4        | 0.77        | 0.18        |
| 378        | gi 19683948        | TXNDC9 protein                                                     | 91         | 4        | 0.77        | 0.19        |
| 379        | gi 182890          | Glucose-6-phosphate dehydrogenase                                  | 93         | 2        | 0.77        | 0.19        |
| <b>380</b> | <b>gi 49065350</b> | <b>Rab1B</b>                                                       | <b>417</b> | <b>1</b> | <b>0.77</b> | <b>0.20</b> |
| 381        | gi 32425722        | VAT1 protein                                                       | 372        | 8        | 0.76        | 0.17        |
| <b>382</b> | <b>gi 54696730</b> | <b>Annexin A11</b>                                                 | <b>104</b> | <b>2</b> | <b>0.76</b> | <b>0.22</b> |
| 383        | gi 45501322        | Lactate dehydrogenase A                                            | 316        | 8        | 0.76        | 0.19        |
| 384        | gi 30583423        | DnaJ (Hsp40) homologue, subfamilyA, member 1                       | 159        | 2        | 0.76        | 0.17        |
| 385        | gi 54696396        | Lactate dehydrogenase B                                            | 276        | 10       | 0.75        | 0.20        |
| 386        | gi 21595720        | RUFY1 protein                                                      | 184        | 5        | 0.75        | 0.20        |
| 387        | gi 44890424        | MARCKS-like1                                                       | 102        | 2        | 0.74        | 0.21        |
| 388        | gi 662841          | Heat shock protein 27                                              | 202        | 1        | 0.74        | 0.17        |
| 389        | gi 7671655         | Translocase of outer mitochondrial membrane 34                     | 47         | 1        | 0.74        | 0.08        |
| 390        | gi 34223697        | Insulin receptor tyrosine kinase substrate                         | 73         | 2        | 0.73        | 0.19        |
| 391        | gi 55662983        | Kinesin family member 5B                                           | 85         | 2        | 0.73        | 0.22        |
| 392        | gi 55957740        | RUN and SH3 domain containing 1                                    | 158        | 5        | 0.73        | 0.21        |
| 393        | gi 47496659        | PRDX2                                                              | 108        | 1        | 0.72        | 0.18        |
| 394        | gi 4758544         | Heterogeneous nuclear ribonucleoprotein C                          | 47         | 1        | 0.72        | 0.23        |
| 395        | gi 55665263        | G protein-coupled receptor 107                                     | 46         | 1        | 0.72        | 0.26        |
| 396        | gi 18997185        | NIMA-related kinase Nek8                                           | 56         | 2        | 0.71        | 0.21        |
| 397        | gi 30354619        | YWHAZ protein                                                      | 303        | 4        | 0.71        | 0.18        |
| 398        | gi 56203412        | Phospholipase A2, group IVA                                        | 95         | 3        | 0.71        | 0.17        |
| 399        | gi 12052969        | Unknown protein                                                    | 148        | 3        | 0.71        | 0.13        |
| 400        | gi 71891760        | Unknown protein KIAA0683                                           | 46         | 1        | 0.70        | 0.20        |
| 401        | gi 24429617        | RNA polymerase III subunit RPC2                                    | 50         | 1        | 0.70        | 0.19        |
| 402        | gi 30582847        | Cell division cycle 2, G1 to S and G2 to M                         | 99         | 2        | 0.70        | 0.16        |
| 403        | gi 54261593        | Unknown protein                                                    | 90         | 1        | 0.70        | 0.07        |
| 404        | gi 39645106        | Sec23-interacting protein p125                                     | 97         | 3        | 0.69        | 0.18        |
| 405        | gi 89060144        | Unknown protein LOC57481                                           | 54         | 1        | 0.69        | 0.28        |
| 406        | gi 17384416        | RAD23 homology B                                                   | 100        | 2        | 0.68        | 0.15        |
| 407        | gi 63102287        | Rab13                                                              | 141        | 2        | 0.67        | 0.19        |
| 408        | gi 6120135         | COP9 complex subunit 7a                                            | 69         | 1        | 0.67        | 0.16        |
| 409        | gi 89059963        | Unknown protein KIAA1817                                           | 58         | 2        | 0.67        | 0.17        |
| 410        | gi 35830           | Ubiquitin activating enzyme E1                                     | 137        | 3        | 0.67        | 0.15        |
| 411        | gi 13445272        | Rab32                                                              | 54         | 1        | 0.64        | 0.16        |
| 412        | gi 1477565         | GEF p532                                                           | 436        | 11       | 0.64        | 0.12        |
| 413        | gi 1654346         | Ubiquitin fusion-degradation 1-like protein                        | 61         | 1        | 0.64        | 0.17        |
| 414        | gi 1941923         | YWHAH                                                              | 254        | 1        | 0.63        | 0.10        |
| 415        | gi 1666075         | Ubiquitin hydrolase                                                | 131        | 2        | 0.63        | 0.13        |



|            |                    |                                                      |            |          |             |             |
|------------|--------------------|------------------------------------------------------|------------|----------|-------------|-------------|
| 416        | gi 755746          | p85 Mcm protein                                      | 105        | 2        | 0.63        | 0.16        |
| 417        | gi 39645311        | NIP30 protein                                        | 67         | 1        | 0.63        | 0.13        |
| 418        | gi 1143492         | BiP                                                  | 169        | 4        | 0.63        | 0.20        |
| 419        | gi 230868          | Glyceraldehyde-3-Phosphate Dehydrogenase             | 143        | 5        | 0.62        | 0.15        |
| 420        | gi 2465729         | TFAR15                                               | 50         | 1        | 0.62        | 0.17        |
| 421        | gi 1478503         | SCG10                                                | 53         | 1        | 0.62        | 0.16        |
| 422        | gi 5714634         | Niemann-Pick C1 protein                              | 67         | 1        | 0.61        | 0.15        |
| 423        | gi 1136228         | UV-damaged DNA binding factor                        | 227        | 5        | 0.60        | 0.15        |
| 424        | gi 30582841        | Profilin 1                                           | 89         | 2        | 0.60        | 0.18        |
| 425        | gi 52545677        | Hypothetical protein                                 | 54         | 1        | 0.60        | 0.13        |
| <b>426</b> | <b>gi 54696200</b> | <b>Rap1A</b>                                         | <b>146</b> | <b>5</b> | <b>0.60</b> | <b>0.16</b> |
| 427        | gi 62702173        | Unknown protein                                      | 94         | 2        | 0.60        | 0.09        |
| 428        | gi 5419633         | Moesin                                               | 331        | 5        | 0.59        | 0.16        |
| 429        | gi 31419796        | Discoidin domain receptor family, member 2 precursor | 62         | 3        | 0.59        | 0.14        |
| 430        | gi 1170586         | Ras GTPase-activating protein IQGAP1 (p195)          | 302        | 5        | 0.59        | 0.18        |
| 431        | gi 15079512        | Protein kinase C, delta binding protein              | 95         | 2        | 0.59        | 0.10        |
| <b>432</b> | <b>gi 999937</b>   | <b>Annexin V</b>                                     | <b>94</b>  | <b>2</b> | <b>0.59</b> | <b>0.14</b> |
| 433        | gi 37595069        | Neuroblastoma RAS viral (v-ras) oncogene homologue   | 107        | 2        | 0.58        | 0.14        |
| 434        | gi 21707505        | Bone marrow stromal cell antigen 2                   | 53         | 1        | 0.58        | 0.13        |
| 435        | gi 20379102        | Rac1                                                 | 80         | 1        | 0.58        | 0.17        |
| 436        | gi 12803567        | Transgelin 2                                         | 89         | 3        | 0.58        | 0.13        |
| 437        | gi 25121972        | Copine VIII                                          | 57         | 1        | 0.58        | 0.23        |
| 438        | gi 1197636         | p105 MCM                                             | 53         | 2        | 0.57        | 0.13        |
| <b>439</b> | <b>gi 464541</b>   | <b>Radixin</b>                                       | <b>302</b> | <b>3</b> | <b>0.57</b> | <b>0.17</b> |
| 440        | gi 7959259         | Unknown protein KIAA1499                             | 65         | 3        | 0.57        | 0.11        |
| 441        | gi 15029597        | Progesterin induced protein                          | 332        | 9        | 0.57        | 0.13        |
| 442        | gi 31127073        | RANBP9 protein                                       | 109        | 2        | 0.57        | 0.18        |
| 443        | gi 187281          | M4 protein                                           | 46         | 1        | 0.56        | 0.13        |
| 444        | gi 181400          | Cytokeratin 8                                        | 307        | 5        | 0.55        | 0.14        |
| 445        | gi 42406425        | VPS13C-1A protein                                    | 100        | 5        | 0.55        | 0.10        |
| 446        | gi 68084446        | Solute carrier family, member 2                      | 683        | 29       | 0.55        | 0.14        |
| 447        | gi 27227551        | Class II $\beta$ tubulin isotype                     | 495        | 1        | 0.55        | 0.24        |
| 448        | gi 37181332        | EMMPRN/other basigin variants                        | 71         | 2        | 0.54        | 0.11        |
| 449        | gi 3319931         | Melanoma antigen family D, 2                         | 74         | 1        | 0.54        | 0.10        |
| 450        | gi 30311           | Cytokeratin 18                                       | 115        | 2        | 0.54        | 0.13        |
| 451        | gi 55665020        | Prostaglandin F2 receptor negative regulator         | 124        | 4        | 0.53        | 0.11        |
| 452        | gi 183225          | G protein, $\alpha$ subunit                          | 253        | 7        | 0.53        | 0.13        |
| 453        | gi 12963885        | Prostate antigen PARIS-1                             | 55         | 1        | 0.52        | 0.18        |
| 454        | gi 27469833        | Armadillo repeat containing 8                        | 115        | 3        | 0.52        | 0.13        |
| 455        | gi 55749758        | Unknown protein LOC57609                             | 63         | 1        | 0.51        | 0.10        |
| 456        | gi 416178          | Desmoglein 2                                         | 88         | 2        | 0.51        | 0.11        |
| 457        | gi 2653424         | Inositol polyphosphate 5-phosphatase                 | 64         | 1        | 0.51        | 0.12        |
| 458        | gi 49456297        | PRDX4                                                | 103        | 2        | 0.50        | 0.12        |
| 459        | gi 40789065        | Unknown protein KIAA0079                             | 241        | 5        | 0.50        | 0.11        |
| 460        | gi 27503713        | Solute carrier family 7, member 5                    | 143        | 1        | 0.50        | 0.10        |
| 461        | gi 20381372        | Solute carrier family 7, member6                     | 61         | 1        | 0.49        | 0.17        |
| 462        | gi 52632407        | SEC13-like 1                                         | 180        | 7        | 0.48        | 0.11        |
| 463        | gi 31657226        | Galectin-3                                           | 76         | 4        | 0.48        | 0.11        |
| <b>464</b> | <b>gi 1703319</b>  | <b>AnnexinIV (LipocortinIV, EndonexinI)</b>          | <b>105</b> | <b>2</b> | <b>0.47</b> | <b>0.15</b> |
| <b>465</b> | <b>gi 71773329</b> | <b>AnnexinVI</b>                                     | <b>285</b> | <b>6</b> | <b>0.47</b> | <b>0.10</b> |
| 466        | gi 3282205         | Prostate apoptosis response protein par-4            | 49         | 1        | 0.47        | 0.03        |
| 467        | gi 62087720        | Dynamin-like protein DYNIV-11                        | 74         | 3        | 0.47        | 0.12        |
| 468        | gi 37852           | Vimentin                                             | 51         | 1        | 0.47        | 0.09        |
| 469        | gi 30582531        | Cofilin1                                             | 125        | 4        | 0.46        | 0.10        |
| 470        | gi 190028          | T-plastin polypeptide                                | 121        | 2        | 0.45        | 0.16        |
| 471        | gi 62089356        | Ret finger protein                                   | 57         | 1        | 0.45        | 0.08        |
| <b>472</b> | <b>gi 55959292</b> | <b>Annexin A1</b>                                    | <b>79</b>  | <b>3</b> | <b>0.45</b> | <b>0.14</b> |
| 473        | gi 46249758        | Villin 2                                             | 513        | 10       | 0.45        | 0.10        |
| 474        | gi 6424942         | ALG-2 interacting protein 1                          | 168        | 3        | 0.44        | 0.12        |
| 475        | gi 29124496        | Viral oncogene yes-1 homolog 1                       | 147        | 3        | 0.44        | 0.10        |
| <b>476</b> | <b>gi 306785</b>   | <b>G protein <math>\beta</math> subunit</b>          | <b>64</b>  | <b>2</b> | <b>0.44</b> | <b>0.10</b> |
| 477        | gi 757924          | Epidermal growth factor receptor                     | 114        | 4        | 0.43        | 0.08        |
| 478        | gi 47117499        | Zinc finger CCCH type anti-viral protein 1           | 228        | 3        | 0.43        | 0.10        |
| 479        | gi 14250401        | Actin, $\beta$                                       | 502        | 20       | 0.43        | 0.09        |
| 480        | gi 1174072         | G $\alpha$ -q                                        | 71         | 2        | 0.42        | 0.10        |
| 481        | gi 225451          | Decay accelerating factor                            | 85         | 3        | 0.42        | 0.11        |
| 482        | gi 7715039         | Sec31                                                | 752        | 39       | 0.41        | 0.10        |
| 483        | gi 2627129         | Polyubiquitin                                        | 328        | 22       | 0.40        | 0.09        |
| 484        | gi 54695954        | Myelin protein zero-like1                            | 56         | 1        | 0.40        | 0.07        |
| 485        | gi 21754049        | Unknown protein                                      | 61         | 1        | 0.39        | 0.05        |
| 486        | gi 125484          | Hepatocyte growthfactor receptor precursor           | 74         | 1        | 0.38        | 0.06        |
| 487        | gi 5457119         | Junction adhesion molecule                           | 56         | 2        | 0.37        | 0.06        |
| 488        | gi 14248495        | MEG3                                                 | 64         | 3        | 0.37        | 0.11        |
| 489        | gi 4588526         | Nuclear chloride channel                             | 54         | 2        | 0.37        | 0.03        |
| 490        | gi 17389486        | Phenylalanine-tRNA synthetase-like                   | 167        | 3        | 0.37        | 0.09        |
| 491        | gi 21070332        | Lysosome-associated membrane protein-3 (LAMP-3)      | 60         | 5        | 0.36        | 0.10        |
| 492        | gi 5730051         | Solute carrier family 2, member 1                    | 82         | 4        | 0.34        | 0.07        |
| 493        | gi 190281          | Protein phosphatase 1 $\alpha$ subunit (PPP1A)       | 44         | 1        | 0.34        | 0.08        |
| 494        | gi 62089404        | Coronin, actin binding protein                       | 56         | 1        | 0.34        | 0.08        |
| 495        | gi 35010           | Neural cell adhesion molecule L1                     | 140        | 3        | 0.33        | 0.08        |
| 496        | gi 61743954        | AHNAK nucleoprotein                                  | 391        | 8        | 0.33        | 0.09        |
| 497        | gi 37999904        | Scavenger receptor class B member 1                  | 97         | 2        | 0.33        | 0.10        |
| 498        | gi 62897641        | Solute carrier family 16, member 3                   | 198        | 5        | 0.33        | 0.09        |
| 499        | gi 125333          | Ephrin type-A receptor 2 precursor                   | 80         | 2        | 0.32        | 0.04        |

|     |             |                                                                    |            |          |             |             |
|-----|-------------|--------------------------------------------------------------------|------------|----------|-------------|-------------|
| 500 | gi 15217171 | CD81 partner 3                                                     | 101        | 2        | 0.32        | 0.08        |
| 501 | gi 13633711 | Rho-related GTP-binding protein RhoF                               | 70         | 1        | 0.32        | 0.09        |
| 502 | gi 15080812 | MHC class I antigen precursor (several indistinguishable isoforms) | 92         | 2        | 0.31        | 0.07        |
| 503 | gi 12804857 | SQSTM1 protein                                                     | 94         | 1        | 0.31        | 0.08        |
| 504 | gi 6996444  | CTL2 protein                                                       | 67         | 1        | 0.31        | 0.07        |
| 505 | gi 30582653 | CD47 antigen                                                       | 58         | 1        | 0.31        | 0.07        |
| 506 | gi 854189   | Tropomyosin isoform                                                | 46         | 1        | 0.29        | 0.08        |
| 507 | gi 28614    | <b>Aldolase A/B/C</b>                                              | <b>239</b> | <b>5</b> | <b>0.29</b> | <b>0.07</b> |
| 508 | gi 86988    | Ca <sup>2+</sup> -transporting ATPase                              | 154        | 2        | 0.28        | 0.06        |
| 509 | gi 62089374 | Integrin $\alpha$ -V precursor                                     | 177        | 5        | 0.28        | 0.07        |
| 510 | gi 3694920  | <b>Putative poly (ADP-ribosyl) transferase; VAULT protein</b>      | <b>315</b> | <b>8</b> | <b>0.28</b> | <b>0.07</b> |
| 511 | gi 62898293 | Programmed cell death 6                                            | 161        | 6        | 0.28        | 0.07        |
| 512 | gi 2795863  | Syntenin                                                           | 69         | 2        | 0.27        | 0.07        |
| 513 | gi 12803195 | Galectin 3 binding protein                                         | 67         | 1        | 0.25        | 0.06        |
| 514 | gi 15418734 | ABC transporter ABCG2                                              | 62         | 1        | 0.25        | 0.06        |
| 515 | gi 124963   | Integrin $\beta$ -1 precursor                                      | 141        | 4        | 0.24        | 0.06        |
| 516 | gi 34148711 | Melanoma chondroitin sulfate proteoglycan                          | 264        | 5        | 0.23        | 0.02        |
| 517 | gi 68067956 | Intercellular adhesion molecule 1 precursor (ICAM-1)               | 268        | 7        | 0.22        | 0.04        |
| 518 | gi 13177796 | G protein-coupled receptor, family C, group 5, member A            | 99         | 3        | 0.19        | 0.04        |
| 519 | gi 15079985 | Solute carrier family 9, isoform 3, regulator 1                    | 111        | 1        | 0.16        | 0.05        |
| 520 | gi 15990478 | Major vault protein                                                | 838        | 20       | 0.15        | 0.03        |
| 521 | gi 17865536 | Podocalyxin-like protein 1 precursor                               | 104        | 1        | 0.14        | 0.04        |
| 522 | gi 20138067 | LIM domain and actin-binding protein 1                             | 48         | 1        | 0.08        | 0.03        |

Control and mock CCV fractions were prepared as in Fig.1 and analyzed by iTRAQ in conjunction with LC-MS/MS (Fig. 3). Identified proteins were ranked based on their relative abundance in mock and control CCVs; a high rank corresponds to a high ratio of control/mock CCVs and, thus, to candidate CCV proteins. The Mascot score reflects the confidence with which a protein was identified; a score >36 indicates >95% confidence of identification. "Peptides quantified" indicates how many iTRAQ-labeled peptides were used for the quantitation. The control/mock ratio corresponds to the relative abundance of a protein in control and mock CCVs; the ratio is the average of two technical replicates. Likely false positives among high ranking proteins are in italics. Proteins that were identified in CCV preparations by Blondeau et al. (2004) or Girard et al. (2005) but are <50% depleted from mock CCVs (and thus not predicted to be genuine CCV proteins) are in bold. Please note that ratios <1 indicate proteins that are enriched in the mock CCVs relative to the control CCVs, suggesting that either their expression is increased or their subcellular localization is changed by clathrin heavy chain knockdown.

| Table S2. Summary of CCV proteins identified in this study by different methods |             |                                             |                                              |         |         |              |       |
|---------------------------------------------------------------------------------|-------------|---------------------------------------------|----------------------------------------------|---------|---------|--------------|-------|
| Number                                                                          | Protein ID  | Protein name                                | Established CCV protein?                     | 1D-PAGE | 2D-DIGE | Western blot | iTRAQ |
| 1                                                                               | gi 14043007 | AP-1 1                                      | √                                            | +       | +       | +            | +     |
| 2                                                                               | gi 12643391 | AP-1                                        | √                                            | ND      | ND      | +            | +     |
| 3                                                                               | gi 17028334 | AP-1 1A                                     | √                                            | ND      | +       | +            | +     |
| 4                                                                               | gi 30582397 | AP-1 1A                                     | √                                            | ND      | ND      | ND           | +     |
| 5                                                                               | gi 33150596 | AP-1 1B                                     | √                                            | ND      | ND      | ND           | +     |
| 6                                                                               | gi 19913414 | AP-2                                        | √                                            | ND      | ND      | +            | +     |
| 7                                                                               | gi 4557469  | AP-2 2                                      | √                                            | ND      | +       | +            | +     |
| 8                                                                               | gi 15489411 | AP-2 2                                      | √                                            | ND      | ND      | +            | +     |
| 9                                                                               | gi 57162630 | AP-3 3A                                     | New                                          | ND      | ND      | +            | +     |
| 10                                                                              | gi 56205243 | Auxilin                                     | √                                            | ND      | ND      | ND           | +     |
| 11                                                                              | gi 47086495 | BLOC-1, subunit 3                           | New                                          | ND      | ND      | ND           | +     |
| 12                                                                              | gi 25090897 | CALM                                        | √                                            | ND      | ND      | ND           | +     |
| 13                                                                              | gi 8922952  | Cappuccino                                  | New                                          | ND      | ND      | ND           | +     |
| 14                                                                              | gi 21903712 | Carboxypeptidase D                          | √                                            | ND      | ND      | ND           | +     |
| 15                                                                              | gi 3294548  | Cathepsin Z (lysosomal)                     | New                                          | ND      | ND      | ND           | +     |
| 16                                                                              | gi 8546849  | CD-Mannose 6-phosphate receptor             | √                                            | ND      | ND      | ND           | +     |
| 17                                                                              | gi 55662275 | CI-Mannose 6-phosphate receptor             | √                                            | +       | ND      | +            | +     |
| 18                                                                              | gi 32451593 | Clathrin heavy chain (CHC17)                | √                                            | +       | +       | +            | +     |
| 19                                                                              | gi 1335854  | Clathrin heavy chain homologue (CHC22)      | New                                          | ND      | ND      | ND           | +     |
| 20                                                                              | gi 17402231 | Clathrin light chain a                      | √                                            | ND      | +       | ND           | +     |
| 21                                                                              | gi 116505   | Clathrin light chain b                      | √                                            | ND      | ND      | ND           | +     |
| 22                                                                              | gi 47604944 | CVAK104                                     | √                                            | ND      | +       | +            | +/=   |
| 23                                                                              | gi 62751805 | D19                                         | New                                          | ND      | ND      | ND           | +     |
| 24                                                                              | gi 30582933 | DNase II (lysosomal)                        | New                                          | ND      | ND      | ND           | +     |
| 25                                                                              | gi 1363934  | Dynamin-2                                   | √                                            | ND      | ND      | ND           | +     |
| 26                                                                              | gi 41016993 | EpsinR/Enthoprotin                          | √                                            | ND      | +       | +            | +     |
| 27                                                                              | gi 47125326 | Ferritin heavy chain                        | √                                            | ND      | ND      | ND           | +     |
| 28                                                                              | gi 182516   | Ferritin light subunit                      | √                                            | ND      | ND      | ND           | +     |
| 29                                                                              | gi 17375734 | GAK/auxilin2                                | √                                            | ND      | ND      | ND           | +     |
| 30                                                                              | gi 15214696 | Glucosamine ( <i>N</i> -acetyl)-6-sulfatase | New                                          | ND      | ND      | ND           | +     |
| 31                                                                              | gi 13431563 | Hip1R                                       | √                                            | ND      | ND      | ND           | +     |
| 32                                                                              | gi 67477390 | OCRL-1                                      | √                                            | ND      | ND      | ND           | +     |
| 33                                                                              | gi 62287155 | NECAP                                       | √                                            | ND      | ND      | ND           | +     |
| 34                                                                              | gi 7920147  | <i>N</i> -ethylmaleimide-sensitive factor   | √                                            | ND      | +       | ND           | +     |
| 35                                                                              | gi 6912574  | Pallidin                                    | New                                          | ND      | ND      | +            | ND    |
| 36                                                                              | gi 2143260  | PI 3-kinase C2                              | √                                            | ND      | ND      | ND           | +     |
| 37                                                                              | gi 56205909 | Rab4A                                       | √                                            | ND      | ND      | ND           | +     |
| 38                                                                              | gi 54695838 | Rab5C                                       | √                                            | ND      | ND      | ND           | +     |
| 39                                                                              | gi 47678695 | SNAP29                                      | New                                          | ND      | ND      | +            | ND    |
| 40                                                                              | gi 30582345 | Snapin                                      | New                                          | ND      | ND      | ND           | +     |
| 41                                                                              | gi 9716092  | Sortilin                                    | √                                            | ND      | ND      | ND           | +     |
| 42                                                                              | gi 62896680 | Sorting nexin 1                             | New                                          | ND      | +       | +            | +/=   |
| 43                                                                              | gi 2827434  | Sorting nexin 2                             | New                                          | ND      | +       | ND           | +     |
| 44                                                                              | gi 9557955  | Sorting nexin 5                             | New                                          | ND      | +       | ND           | +     |
| 45                                                                              | gi 4689252  | Sorting nexin 6                             | New                                          | ND      | +       | ND           | +/=   |
| 46                                                                              | gi 13477131 | Sorting nexin 9                             | √                                            | ND      | +       | ND           | +     |
| 47                                                                              | gi 55663531 | Syntaxin 6                                  | New                                          | ND      | ND      | +            | +     |
| 48                                                                              | gi 2337920  | Syntaxin 7                                  | New                                          | ND      | ND      | +            | +     |
| 49                                                                              | gi 4433649  | Syntaxin 8                                  | New                                          | ND      | ND      | +            | +     |
| 50                                                                              | gi 2961087  | Syntaxin 16                                 | New                                          | ND      | ND      | +            | ND    |
| 51                                                                              | gi 2226273  | TGN46                                       | √                                            | ND      | ND      | ND           | +     |
| 52                                                                              | gi 70608172 | TPD52                                       | New                                          | ND      | ND      | ND           | +     |
| 53                                                                              | gi 56203491 | TPD52L1                                     | New                                          | ND      | ND      | ND           | +     |
| 54                                                                              | gi 12654697 | Transferrin receptor                        | √                                            | +/=     | +/=     | +/=          | +/=   |
| 55                                                                              | gi 38570101 | Unknown protein, RAB-GAP domain             | New                                          | ND      | ND      | ND           | +     |
| 56                                                                              | gi 15214676 | Unknown protein, putative Rab interactor    | New                                          | ND      | ND      | ND           | +     |
| 57                                                                              | gi 13543574 | VAMP3                                       | New                                          | ND      | ND      | +            | +/=   |
| 58                                                                              | gi 3248920  | VAMP4                                       | New                                          | ND      | ND      | +            | ND    |
| 59                                                                              | gi 39752567 | VAMP7                                       | New                                          | ND      | ND      | +            | +/=   |
| 60                                                                              | gi 9622852  | VPS 26                                      | New                                          | ND      | ND      | +            | +/=   |
| 61                                                                              | gi 17999541 | VPS 35                                      | New                                          | ND      | +       | ND           | ND    |
| 62                                                                              | gi 16877603 | Vti1a                                       | √                                            | ND      | ND      | +            | ND    |
| 63                                                                              | gi 5454166  | Vti1b                                       | √                                            | ND      | ND      | +            | ND    |
| =                                                                               |             | 63 total                                    | 35 established and<br>28 new CCV<br>proteins | 4       | 15      | 25           | 56    |

This table lists all CCV proteins identified in this study. Only proteins that showed clear depletion from mock CCVs by one or more techniques are listed. Four different methods were used to compare control and mock CCVs: 1D-PAGE, 2D-DIGE, Western blotting, and iTRAQ. In the corresponding columns, a plus sign indicates that a protein was identified and depleted from mock CCVs (bona fide CCV protein). +/= indicates that a protein was identified, but only a moderate level of depletion from mock CCVs was observed. ND indicates that a protein was not detected. Proteins whose association with CCVs had previously not been established are annotated as new.

Table S3. List of antibodies

| Antibody against                | Host    | Mono/polyclonal | Name/source                                                                                    |
|---------------------------------|---------|-----------------|------------------------------------------------------------------------------------------------|
| Primary antibodies              |         |                 |                                                                                                |
| AP-1 $\beta$ 1                  | Rabbit  | P               | Page et al., 1995                                                                              |
| AP-1 $\gamma$                   | Rabbit  | P               | Seaman et al., 1996                                                                            |
| AP-2 $\alpha$                   | Rabbit  | P               | Ball et al., 1995                                                                              |
| AP-2 $\beta$ 2                  | Rabbit  | P               | Page et al., 1995                                                                              |
| AP-2 $\mu$ 2                    | Rabbit  | P               | Page et al., 1995                                                                              |
| AP-3 $\mu$ 3                    | Rabbit  | P               | Simpson et al., 1996                                                                           |
| AP-4 $\beta$ 4                  | Rabbit  | P               | Hirst et al., 1999                                                                             |
| CI Mannose-6-phosphate receptor | Rabbit  | P               | 1001/gift from P. Luzio, Cambridge Institute for Medical Research, University of Cambridge, UK |
| Clathrin heavy chain            | Rabbit  | P               | Simpson et al., 1996                                                                           |
| Elongation factor 2             | Goat    | P               | C-14/Santa Cruz Biotechnology, Inc.                                                            |
| EpsinR                          | Rabbit  | P               | Hirst et al., 2003                                                                             |
| Pallidin                        | Mouse   | M               | Nazarian et al., 2006                                                                          |
| Sec 22                          | Rabbit  | P               | Hay et al., 1997                                                                               |
| SNAP 23                         | Rabbit  | P               | Synaptic Systems                                                                               |
| SNAP 29                         | Rabbit  | P               | Synaptic Systems                                                                               |
| Sorting nexin 1                 | Rabbit  | P               | Seaman, 2004                                                                                   |
| Syntaxin 2                      | Rabbit  | P               | Calbiochem                                                                                     |
| Syntaxin 3                      | Rabbit  | P               | Calbiochem                                                                                     |
| Syntaxin 4                      | Mouse   | M               | Transduction Laboratories                                                                      |
| Syntaxin 6                      | Rabbit  | P               | Gift from A. Peden, Genentech, Inc., South San Francisco, CA                                   |
| Syntaxin 7                      | Rabbit  | P               | Gift from A. Peden                                                                             |
| Syntaxin 8                      | Mouse   | M               | BD Biosciences                                                                                 |
| Syntaxin 16                     | Mouse   | M               | Gift from A. Peden                                                                             |
| Syntaxin 17                     | Goat    | P               | Steegmaier et al., 2000                                                                        |
| Transferrin receptor            | Mouse   | P               | Zymed                                                                                          |
| VAMP3                           | Rabbit  | P               | Abcam                                                                                          |
| VAMP4                           | Hamster | P               | Steegmaier et al., 1999                                                                        |
| VAMP7                           | Mouse   | M               | Advani et al., 1999                                                                            |
| VPS26                           | Rabbit  | P               | Seaman, 2004                                                                                   |
| Vti1a                           | Mouse   | M               | BD Biosciences                                                                                 |
| Vti1b                           | Mouse   | M               | BD Biosciences                                                                                 |
| Secondary antibodies            |         |                 |                                                                                                |
| Anti-goat HRP                   | Rabbit  | P               | Sigma-Aldrich                                                                                  |
| Anti-Hamster HRP                | Goat    | P               | Jackson ImmunoResearch Laboratories                                                            |
| Anti-mouse HRP                  | Rabbit  | P               | Sigma-Aldrich                                                                                  |
| Anti-rabbit HRP                 | Goat    | P               | Sigma-Aldrich                                                                                  |
